# Supplementary material
Source: bioRxiv or medRxiv preprint supplement (https://www.biorxiv.org/highwire/filestream/308/field_highwire_adjunct_files/0/001016-1.pdf)
Supplement: Supplementary file [file 001016-1.pdf]

All supplementary plots and tables show results for the following 7 sets of parameter values:

A)  $\mu = 10^{-6}$ ,  $\theta = 0.01$ ,  $\lambda = 1/2$  and 2 dimensions. This is identical to the figures in the main text

B)  $\mu = 10^{-4}$ ,  $\theta = 1$ ,  $\lambda = 1/2$  and 2 dimensions

C)  $\mu = 10^{-6}$ ,  $\theta = 0.01$ ,  $\lambda = 2$  and 2 dimensions

D)  $\mu = 10^{-6}$ ,  $\theta = 0.01$ ,  $\lambda = 1/4$  and 2 dimensions

E)  $\mu = 10^{-6}$ ,  $\theta = 0.01$ ,  $\lambda = 1/2$  and 3 dimensions

F)  $\mu = 10^{-6}$ ,  $\theta = 0.01$ ,  $\lambda = 1/2$  and 4 dimensions

G)  $\mu = 10^{-6}$ ,  $\theta = 0.01$ ,  $\lambda = 1/2$  and 7 dimensions

**Figure S1.** Phenotypic distribution of homozygous alleles as in Figure 1 for all sets of parameter values. For simulations containing more than two dimensions (plots E-G), only the first two dimensions are shown.

**Figure S2.** Epistasis as a function of overdominance as in Figure 3 for all sets of parameter values.

**Figure S3.** Maximum pairwise distance statistic as in Figure 4 for all sets of parameter values.

**Figure S4.** Maximum distance from optimal trajectory statistic as in Figure 5 for all sets of parameter values.

**Figure S5.** Effective number of paths statistic as in Figure 6 for all sets of parameter values.

**Figure S6.** Mean path divergence statistic as in Lobkovsky et. al. (2011) for all sets of parameter values.

**Table S1.** Pairwise Epistasis (n=5,000)

**Table S2.** Conditional Mutations

**Table S3.** Backwards Predictability P Values

**Table S4.** Epistasis and Predictability P values

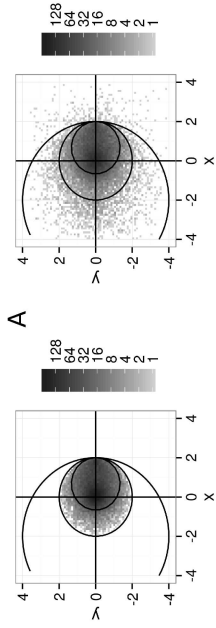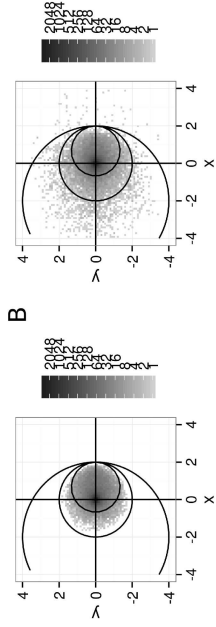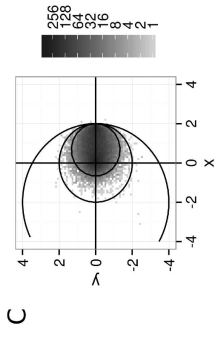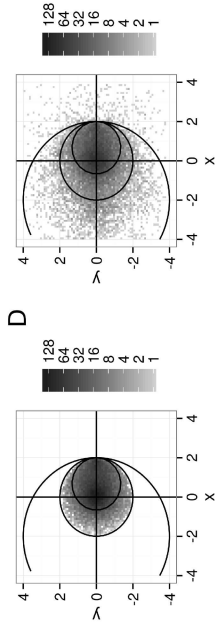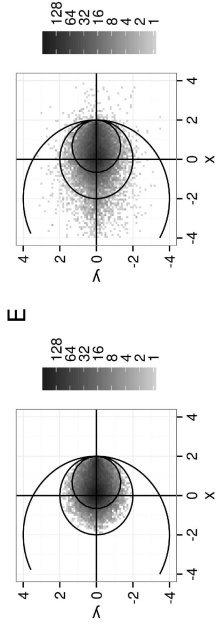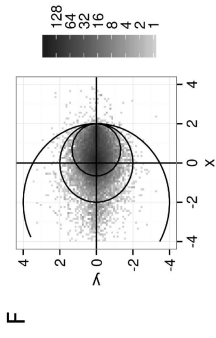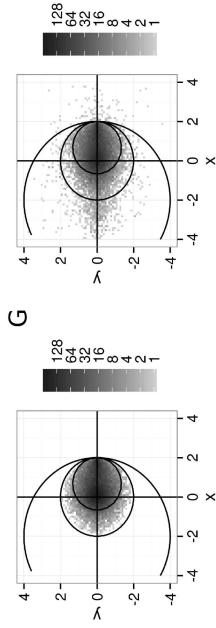

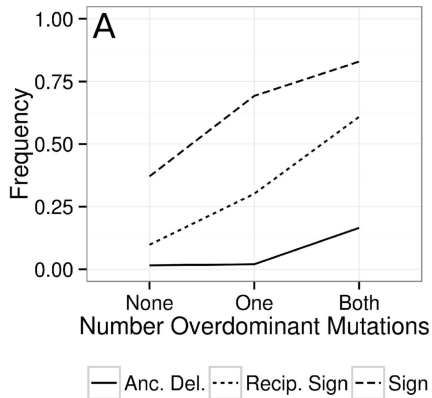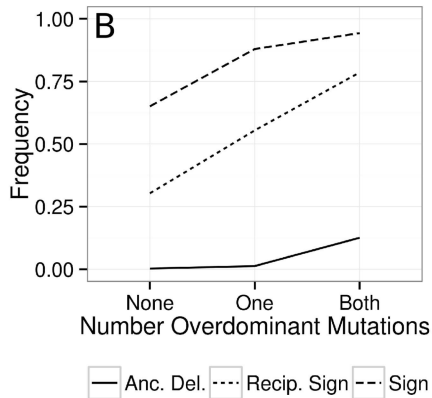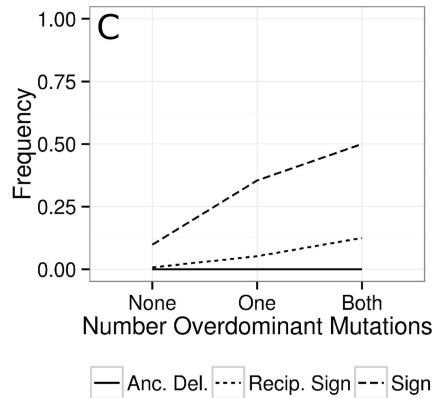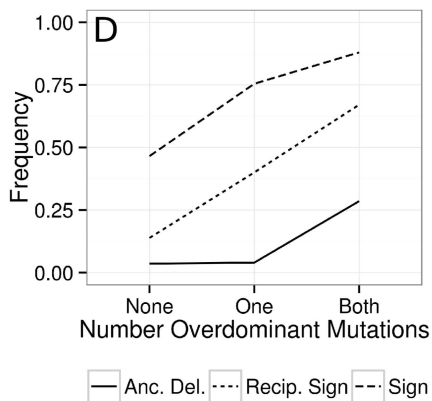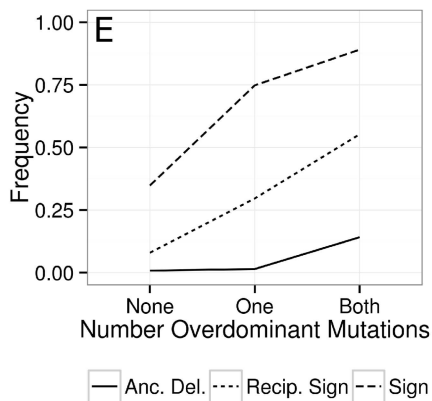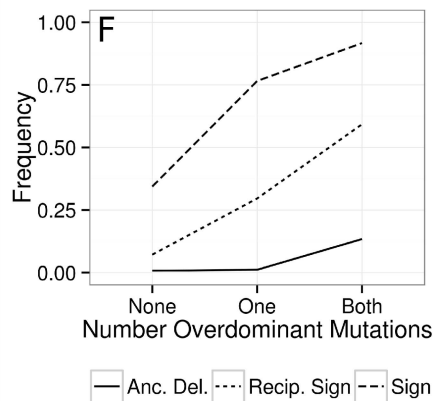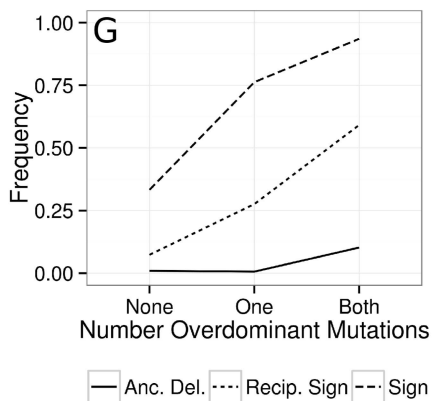

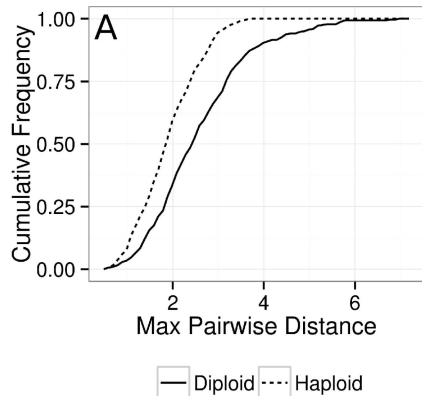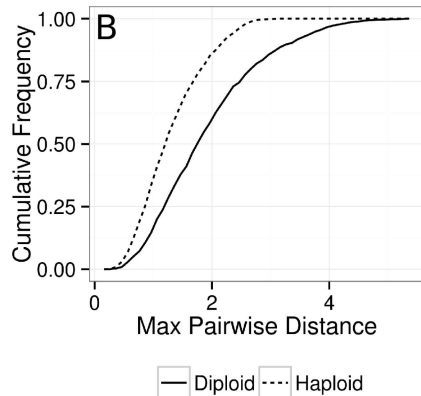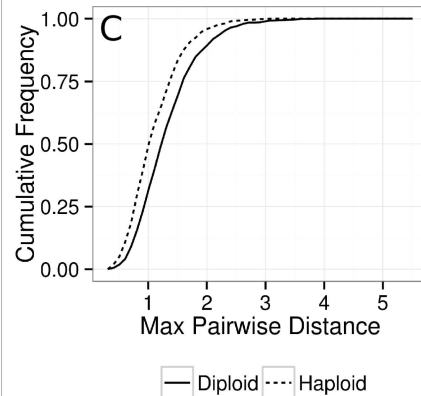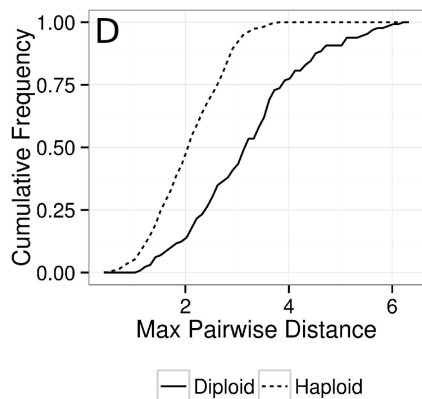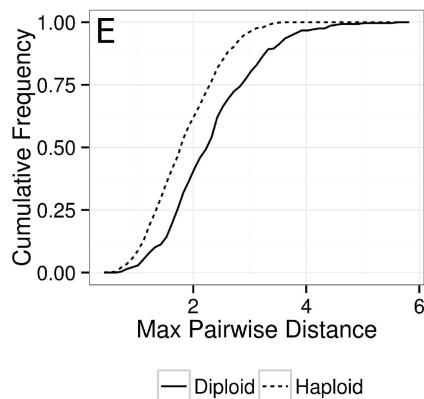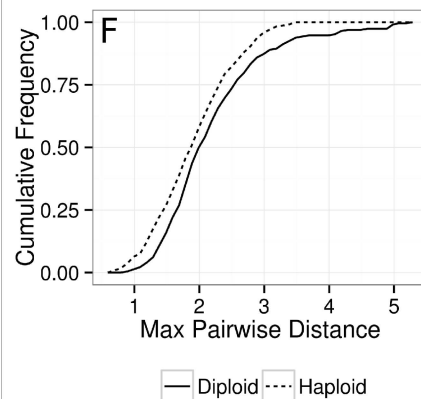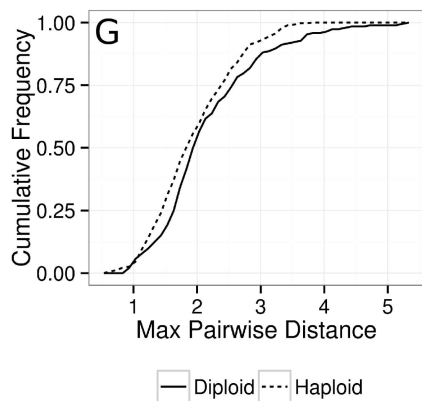

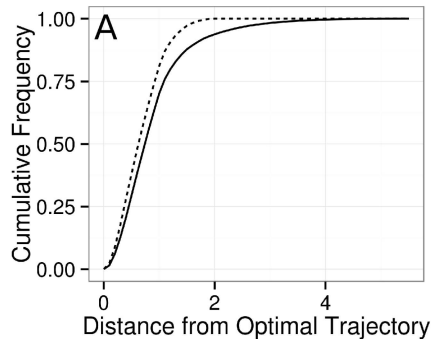

— Diploid - - - Haploid

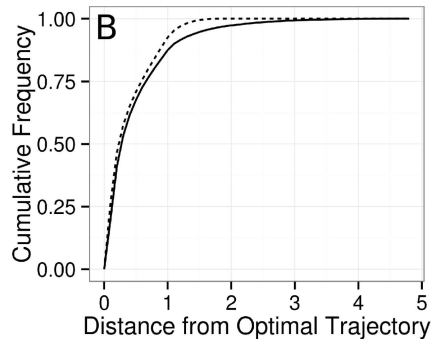

— Diploid - - - Haploid

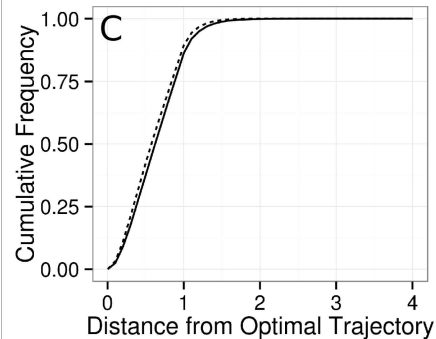

— Diploid - - - Haploid

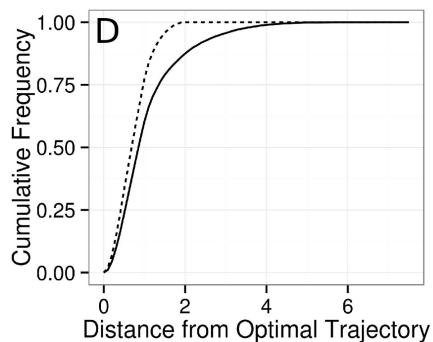

— Diploid - - - Haploid

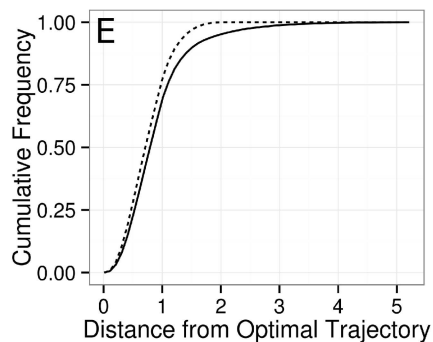

— Diploid - - - Haploid

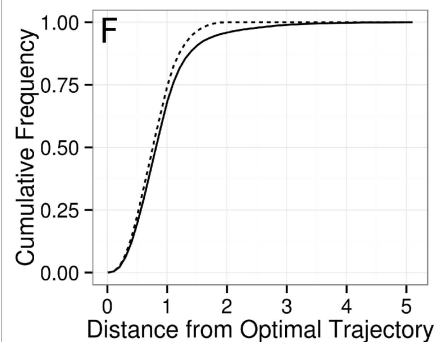

— Diploid - - - Haploid

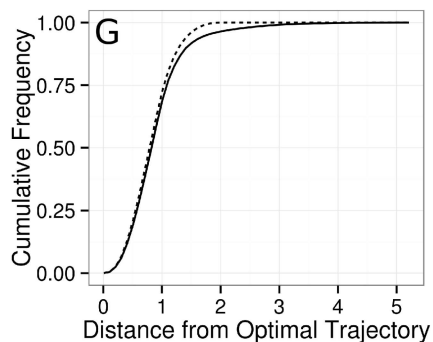

— Diploid - - - Haploid

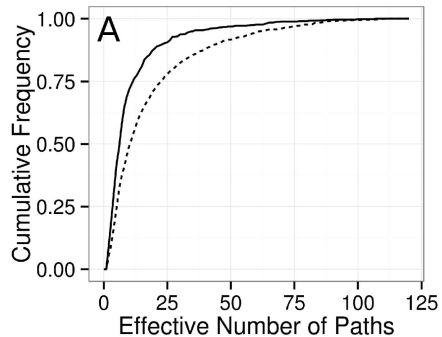

— Diploid ··· Haploid

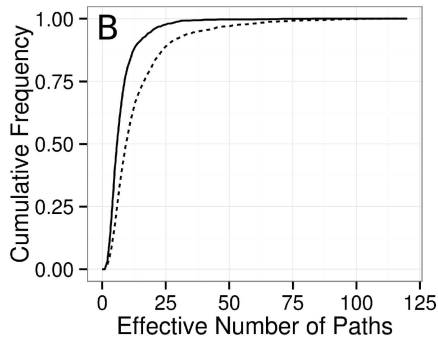

— Diploid ··· Haploid

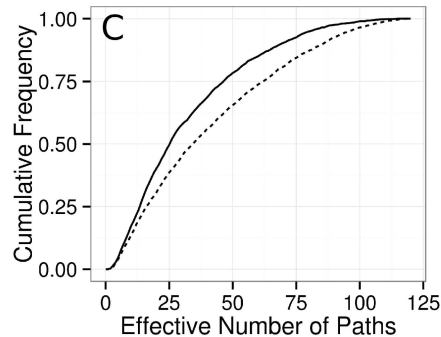

— Diploid ··· Haploid

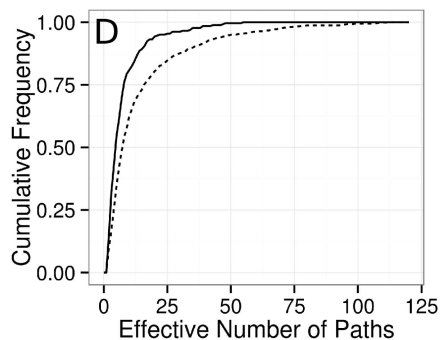

— Diploid ··· Haploid

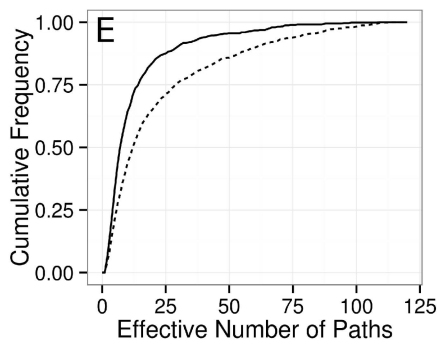

— Diploid ··· Haploid

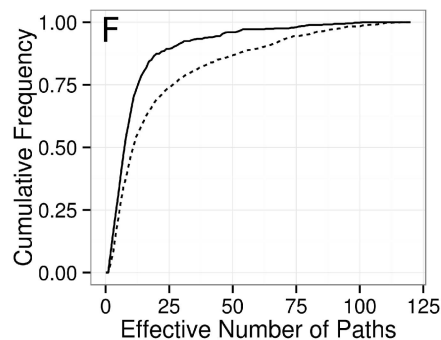

— Diploid ··· Haploid

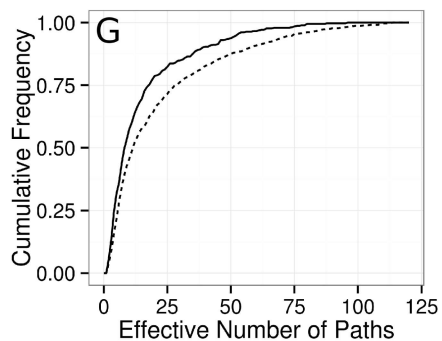

— Diploid ··· Haploid

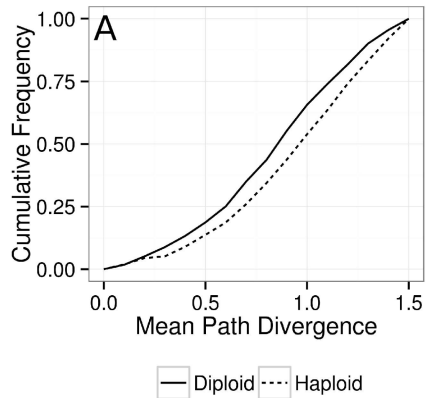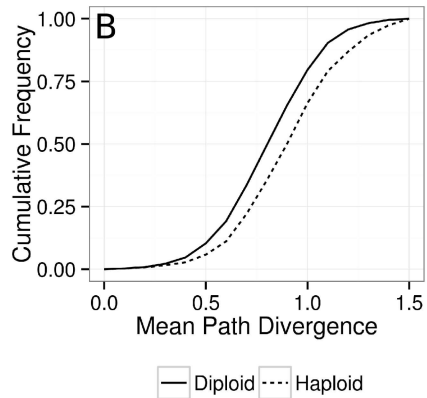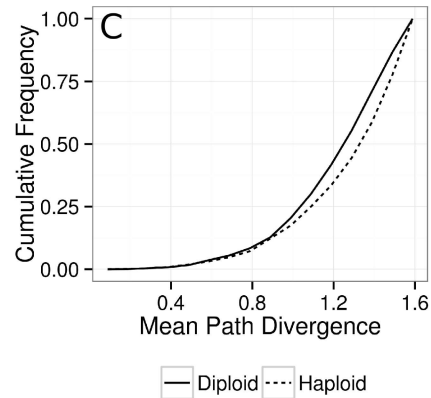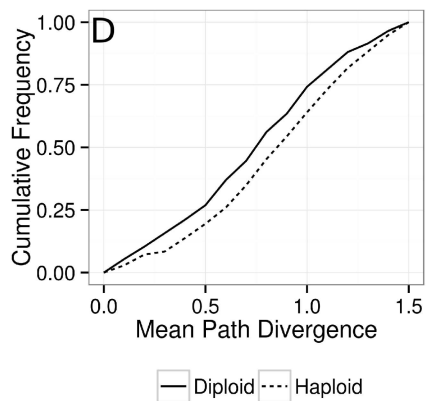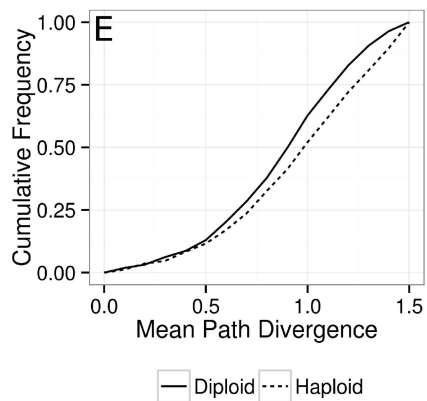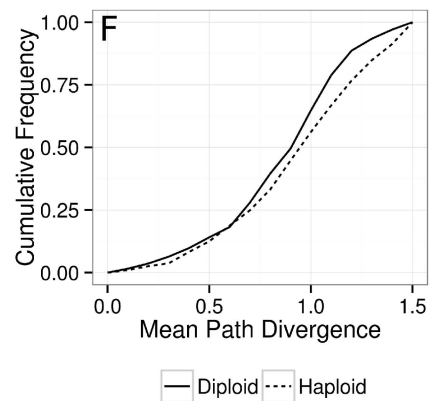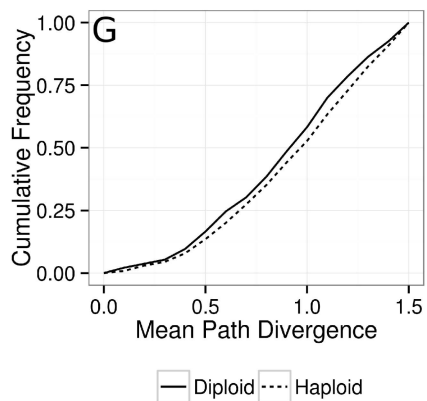



Table S1

| Parameter | $\chi^2$ p-value | Ploidy  | Sign   | Reciprocal Sign | Ancestral Deleterious |
|-----------|------------------|---------|--------|-----------------|-----------------------|
| A         | 8.8E-128         | Haploid | 52.30% | 31.00%          | 16.00%                |
|           |                  | Diploid | 53.00% | 21.40%          | 2.80%                 |
| B         | 5.8E-252         | Haploid | 74.70% | 68.80%          | 47.20%                |
|           |                  | Diploid | 76.40% | 65.10%          | 6.20%                 |
| C         | 1.3E-015         | Haploid | 12.60% | 3.50%           | 0.80%                 |
|           |                  | Diploid | 12.00% | 1.30%           | 0.00%                 |
| D         | 2.8E-151         | Haploid | 61.40% | 51.00%          | 38.00%                |
|           |                  | Diploid | 65.80% | 49.40%          | 17.20%                |
| E         | 7.7E-125         | Haploid | 53.20% | 38.10%          | 23.00%                |
|           |                  | Diploid | 51.40% | 26.70%          | 3.30%                 |
| F         | 3.3E-139         | Haploid | 52.90% | 38.00%          | 23.80%                |
|           |                  | Diploid | 50.60% | 25.40%          | 2.90%                 |
| G         | 2.5E-145         | Haploid | 54.20% | 38.90%          | 24.50%                |
|           |                  | Diploid | 48.80% | 23.20%          | 2.20%                 |

Table S2

| Parameter | $\chi^2$ p-value | Ploidy  | All   | Initial Mutation Overdominant | Initial Mutation Not Overdominant |
|-----------|------------------|---------|-------|-------------------------------|-----------------------------------|
| A         | 1.50E-14         | Haploid | 21.4% | NA                            | NA                                |
|           |                  | Diploid | 26.3% | 62.4%                         | 18.2%                             |
| B         | 1.30E-79         | Haploid | 48.1% | NA                            | NA                                |
|           |                  | Diploid | 40.8% | 82.9%                         | 30.4%                             |
| C         | 4.50E-06         | Haploid | 3.4%  | NA                            | NA                                |
|           |                  | Diploid | 4.6%  | 27.2%                         | 3.7%                              |
| D         | 2.80E-34         | Haploid | 27.4% | NA                            | NA                                |
|           |                  | Diploid | 36.1% | 65.5%                         | 28.0%                             |
| E         | 1.40E-07         | Haploid | 18.3% | NA                            | NA                                |
|           |                  | Diploid | 21.5% | 61.4%                         | 14.0%                             |
| F         | 8.20E-05         | Haploid | 17.4% | NA                            | NA                                |
|           |                  | Diploid | 19.7% | 61.9%                         | 12.1%                             |
| G         | 9.46E-01         | Haploid | 17.6% | NA                            | NA                                |
|           |                  | Diploid | 17.5% | 60.9%                         | 10.3%                             |

Table S3

|   |         | N    | extra mutations | final homozygote advantageous | observed path viable | other paths viable | observed path top 50% most likely | observed path most likely |
|---|---------|------|-----------------|-------------------------------|----------------------|--------------------|-----------------------------------|---------------------------|
| A | Diploid | 645  | 57.98%          | 99.53%                        | 92.87%               | 98.91%             | 80.78%                            | 16.74%                    |
|   | Haploid | 1220 | 7.54%           | 100.00%                       | 100.00%              | 98.44%             | 69.75%                            | 14.10%                    |
| B | Diploid | 2031 | 99.90%          | 100.00%                       | 97.49%               | 99.75%             | 93.30%                            | 38.70%                    |
|   | Haploid | 2295 | 91.94%          | 100.00%                       | 99.56%               | 99.78%             | 96.47%                            | 34.77%                    |
| C | Diploid | 2286 | 45.98%          | 99.96%                        | 99.34%               | 100.00%            | 71.39%                            | 3.85%                     |
|   | Haploid | 2627 | 12.18%          | 100.00%                       | 100.00%              | 100.00%            | 67.34%                            | 4.76%                     |
| D | Diploid | 263  | 48.67%          | 98.10%                        | 90.11%               | 98.10%             | 80.23%                            | 20.91%                    |
|   | Haploid | 679  | 3.68%           | 100.00%                       | 100.00%              | 97.50%             | 67.16%                            | 17.38%                    |
| E | Diploid | 555  | 64.86%          | 99.46%                        | 91.53%               | 97.84%             | 76.58%                            | 12.97%                    |
|   | Haploid | 1283 | 6.31%           | 100.00%                       | 99.92%               | 98.99%             | 66.17%                            | 10.44%                    |
| F | Diploid | 456  | 63.82%          | 99.78%                        | 93.42%               | 98.90%             | 75.00%                            | 12.28%                    |
|   | Haploid | 1164 | 5.50%           | 100.00%                       | 100.00%              | 99.23%             | 66.41%                            | 12.63%                    |
| G | Diploid | 388  | 62.11%          | 99.48%                        | 93.04%               | 98.97%             | 74.23%                            | 11.60%                    |
|   | Haploid | 1008 | 5.56%           | 100.00%                       | 100.00%              | 99.31%             | 64.29%                            | 10.71%                    |

Table S4

P values from chi-square contingency table tests

|   | Hap vs Dip<br>across all 4<br>levels of<br>Epistasis | Diploid Sign<br>Epi. One<br>overdom vs<br>no overdom | Diploid recip<br>sign epi one<br>overdom vs<br>no overdom | Diploid anc<br>del epi one<br>overdom vs<br>no overdom | Diploid sign<br>epi two<br>overdom vs<br>no overdom | diploid recip<br>sign epi two<br>overdom vs<br>no overdom | Diploid anc<br>del epi two<br>overdom vs<br>no overdom | conditional<br>mutation<br>haploid vs<br>diploid | initial mutation<br>vs diploid not<br>overdom<br>initial mutation |
|---|------------------------------------------------------|------------------------------------------------------|-----------------------------------------------------------|--------------------------------------------------------|-----------------------------------------------------|-----------------------------------------------------------|--------------------------------------------------------|--------------------------------------------------|-------------------------------------------------------------------|
| A | 8.84E-128                                            | 2.03E-103                                            | 6.20E-70                                                  | 3.20E-01                                               | 2.37E-61                                            | 2.02E-137                                                 | 4.75E-49                                               | 1.52E-14                                         | 2.09E-290                                                         |
| B | 5.80E-252                                            | 2.23E-71                                             | 1.50E-66                                                  | 2.36E-04                                               | 3.93E-28                                            | 2.55E-69                                                  | 5.87E-59                                               | 1.28E-79                                         | 0.00E+00                                                          |
| C | 1.34E-15                                             | 5.72E-54                                             | 6.21E-16                                                  | 0.00E+00                                               | 1.31E-03                                            | 7.47E-02                                                  | 0.00E+00                                               | 4.53E-06                                         | 1.15E-100                                                         |
| D | 2.75E-151                                            | 8.36E-85                                             | 1.42E-80                                                  | 4.95E-01                                               | 3.50E-77                                            | 6.26E-155                                                 | 1.11E-76                                               | 2.80E-34                                         | 1.90E-177                                                         |
| E | 7.71E-125                                            | 3.76E-157                                            | 1.70E-86                                                  | 5.70E-02                                               | 1.29E-56                                            | 5.26E-101                                                 | 2.28E-46                                               | 1.39E-07                                         | 0.00E+00                                                          |
| F | 3.27E-139                                            | 6.21E-168                                            | 1.17E-94                                                  | 2.66E-01                                               | 1.43E-62                                            | 4.06E-127                                                 | 1.22E-44                                               | 8.25E-05                                         | 0.00E+00                                                          |
| G | 2.51E-145                                            | 6.20E-171                                            | 2.71E-80                                                  | 2.99E-01                                               | 1.99E-61                                            | 5.47E-114                                                 | 4.87E-24                                               | 9.46E-01                                         | 0.00E+00                                                          |

p values from two-tailed t tests

|   | max pairwise<br>dist p value | max dist from<br>optimal p<br>value | Dip vs Hap<br>Effective num<br>paths p value | cor dip<br>effective num<br>paths and<br>num overdom | cor p value<br>dip effective<br>num paths<br>and num<br>overdom | mean path<br>divergence p<br>value |
|---|------------------------------|-------------------------------------|----------------------------------------------|------------------------------------------------------|-----------------------------------------------------------------|------------------------------------|
| A | 9.97E-22                     | 0.00E+00                            | 4.06E-20                                     | -0.345                                               | 1.40E-19                                                        | 4.89E-10                           |
| B | 1.36E-66                     | 7.66E-220                           | 1.38E-79                                     | -0.302                                               | 2.15E-44                                                        | 3.45E-40                           |
| C | 4.98E-27                     | 4.21E-91                            | 5.12E-31                                     | -0.425                                               | 4.52E-101                                                       | 5.11E-12                           |
| D | 6.42E-21                     | 0.00E+00                            | 3.31E-15                                     | -0.282                                               | 1.86E-06                                                        | 4.42E-06                           |
| E | 4.42E-17                     | 0.00E+00                            | 2.15E-23                                     | -0.393                                               | 6.80E-22                                                        | 5.63E-09                           |
| F | 9.75E-07                     | 3.71E-196                           | 6.41E-19                                     | -0.331                                               | 2.68E-13                                                        | 1.63E-07                           |
| G | 3.94E-04                     | 7.81E-111                           | 3.86E-09                                     | -0.287                                               | 4.68E-09                                                        | 9.85E-04                           |
